# Supplementary material
Source: PubMed Central journal article supplement (PMC2962471)
Supplement: supp_M110.178566_Suppfigs.pdf [file supp_M110.178566_Suppfigs.pdf]

## SUPPLEMENTAL FIGURE LEGENDS

**Supplemental Figure 1.** Optimal reaction conditions for WT-hCTPS1 and WT-hCTPS2 activity. (A) Protein expression corresponding to CTPS activity assays. HEK293 cells expressing the designated hCTPS construct were lysed, immunoprecipitated with FLAG antibody conjugated to agarose beads, separated by SDS-PAGE and blotted for FLAG expression. Total protein immunoprecipitated for immunoblots corresponds to 10% of total protein immunoprecipitated for use in CTPS activity assays (0.5 mg for WT-CTPS1, 1.2 mg for  $\Delta$ C-CTPS1, and 0.1 mg for WT-CPTS2, CTPS2-S568A, and CTPS2-S571A). Data is represented as SEM of total FLAG expression from samples corresponding to each day of CTPS activity assays. Activity conditions for hCTPS. HEK293 cells expressing WT-hCTPS1-FLAG (solid squares, solid line) and WT-hCTPS2-FLAG (open triangles, dotted line) were processed as in (A) and assayed for CTPS activity. (B) Samples were incubated at pH 8.1 at the indicated time intervals at 37°C from 1 min to 90 min. Data are expressed as nmol CTP formed and are from n=2 (CTPS1) or n=6 (CTPS2) separate experiments. *Note: The y-axis is expressed as nmol CTP synthesized, not pmol/min CTP as on the other graphs.* (C) Samples were incubated in buffers with the indicated pH values for 1 hr (CTPS1) or 15 min (CTPS2) at 37°C. Data are expressed as pmol/min CTP formed (n=3).

**Supplemental Figure 2.** Analysis of hCTPS oligomerization by gel filtration experiments. (A) Gel filtration standards were separated over a Superose 12 column in an ÄKTA FPLC. Data show a representative experiment and are expressed in mAU detected by the FPLC for each fraction. Peaks represent protein standards. (B) Gel filtration standards from panel A were plotted as a log of the standard molecular weight vs. fraction number, providing a linear standard curve. (C) Lysate from HEK293 cells expressing WT-hCTPS2-FLAG were separated over a Superose 12 column. Data show a representative experiment and are expressed in mAU detected by the FPLC for each fraction in buffer containing no nucleotides. Lysates from HEK293 cells expressing WT-hCTPS2-FLAG were separated over a Superose 12 column in the absence of nucleotides (blue lines, n=5 (CTPS1) and n=4 (CTPS2)), in the presence of 1 mM ATP (red lines, n=4 (CTPS1) and n=3 (CTPS2)), in the presence of 1 mM UTP (green lines, n=5 (CTPS1) and n=4 (CTPS2)), or in the presence of 1 mM ATP and 1 mM UTP (black lines, n=4 (CTPS1) and n=3 (CTPS2)). Fractions were then immunoblotted for (D) endogenous CTPS1 expression or (E) CTPS2-FLAG expression. CTPS monomers elute in fractions 24 and higher, CTPS dimers elute in fractions 22/23, and CTPS tetramers elute in fractions 21 and lower. Data are expressed as percent of total CTPS1 or CTPS2 from all fractions.

**Supplemental Figure 3.** Effect of carboxyl-terminal regulatory domain (CRD) deletion on hCTPS1 activity. HEK293 cells expressing WT-hCTPS1-FLAG (solid squares, solid line) or  $\Delta$ C-hCTPS1-FLAG (open triangles, dotted line) were processed as in Supp Fig.1 and assayed for CTPS activity. (A) Samples were incubated for the indicated time intervals at 37°C from 1 min to 90 min. Data are expressed as nmol CTP formed and are from 3 separate experiments. (B) Samples were incubated with the indicated UTP concentrations for 1 hr at 37°C. (C) Samples were incubated with the indicated CTP concentrations for 1 hr at 37°C. Data in panels B and C are expressed as pmol/min CTP formed and are from n=3 experiments. *Note: The WT-hCTPS1 data is the same data as presented in Supp. Fig. 1 and is shown here for comparison purposes.*

**Supplemental Figure 4.** MS/MS spectral evidence for hCTPS2 phosphorylation. HEK293 cells expressing WT-hCTPS2-FLAG were prepared for mass spectrometry analysis as detailed in Experimental Procedures after treatment with low serum (A-D) or high serum (E-G). Phosphorylation sites identified by LTQ-OrbiTrap were (A) S564, (B) S571, (C) S574, (D) S568 and S571, (E) Y567, (F) S571, and (G) S568 and S571.

**Supplemental Figure 5.** Total tryptic peptide sequence coverage of WT-hCTPS2 mass spectral analysis after (A) low serum and (B) high serum treatment.

## SUPPLEMENTAL TABLE

Supplemental Table 1. Primers used to make CTPS2 mutations. Mutated sequence is bolded and underlined.

| Mutation    | Direction | Primer sequence                                             |
|-------------|-----------|-------------------------------------------------------------|
| CTPS2-S564A | Forward   | 5'-GCAA <u>ACTGTCTTCC</u> <b>GCT</b> GATAGATACAGTGATGCC-3'  |
| CTPS2-S564A | Reverse   | 5'-GGC <u>ATCACTGTATCTATCA</u> <b>GCG</b> GGAAGACAGTTTGC-3' |
| CTPS2-Y567A | Forward   | 5'-TCTTCCAGTGATAGAG <b>GCC</b> AGTGATGCCAGTGAT-3'           |
| CTPS2-Y567A | Reverse   | 5'-ATCACTGGC <u>ATCACTGG</u> <b>CT</b> CTATCACTGGAAGA-3'    |
| CTPS2-S568A | Forward   | 5'-TCCAGTGATAGATAC <b>GCT</b> GATGCCAGTGATGAC-3'            |
| CTPS2-S568A | Reverse   | 5'-GTCATCACTGGC <u>ATCAGC</u> <b>GT</b> ATCTATCACTGGA-3'    |
| CTPS2-S571A | Forward   | 5'-AGATACAGTGATGCC <b>GCT</b> GATGACAGCTTTTCA-3'            |
| CTPS2-S571A | Reverse   | 5'-TGAAAAGCTGTCATC <b>AGC</b> GGCATCACTGTATCT-3'            |
| CTPS2-S574A | Forward   | 5'-GATGCCAGTGATGAC <b>GCCT</b> TTTCAGAGCCAAGG-3'            |
| CTPS2-S574A | Reverse   | 5'-CCTTGGCTCTGAAA <b>AGCG</b> TCATCACTGGCATC-3'             |

# Supplemental Figure 1

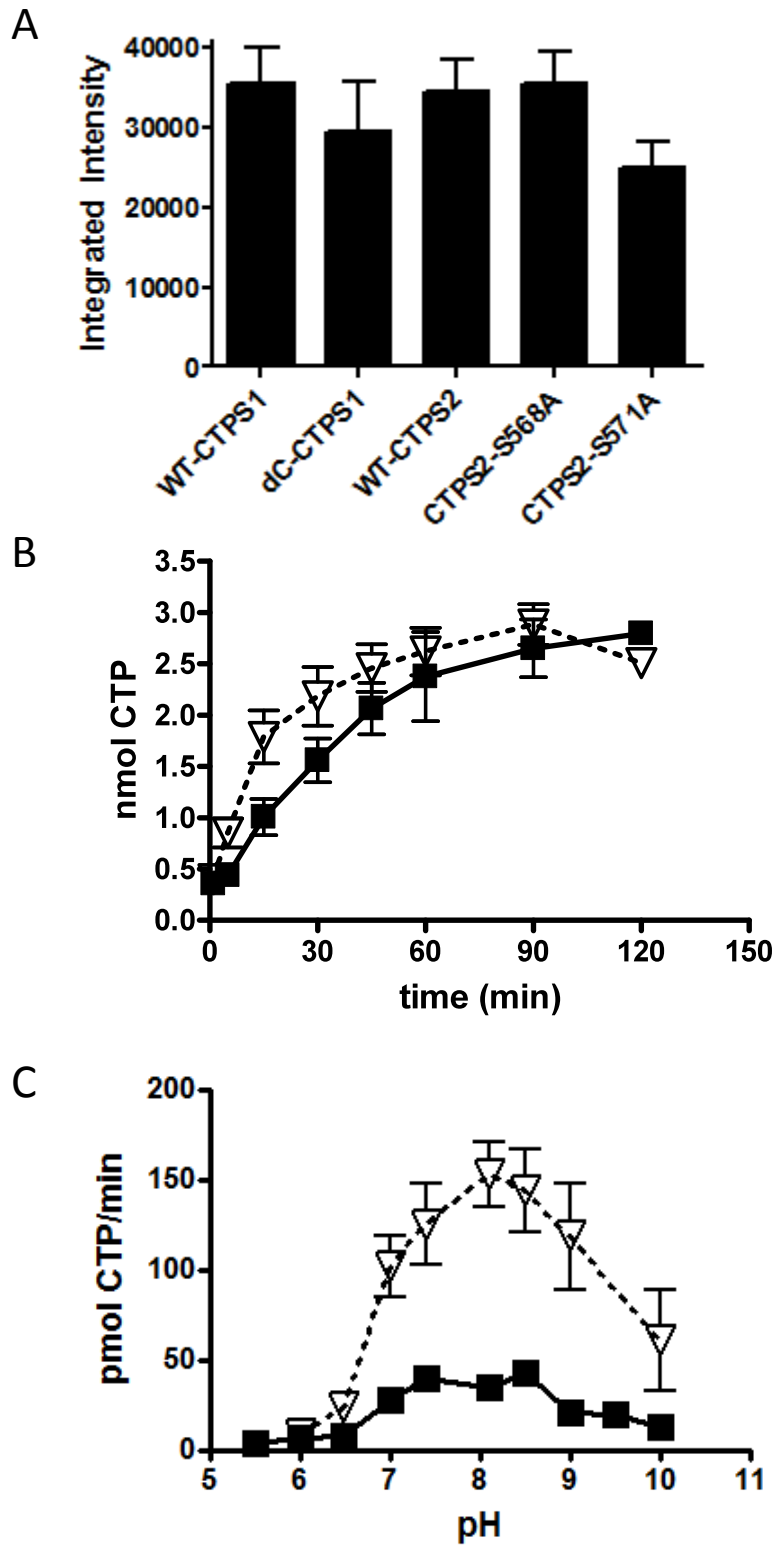

# Supplemental Figure 2

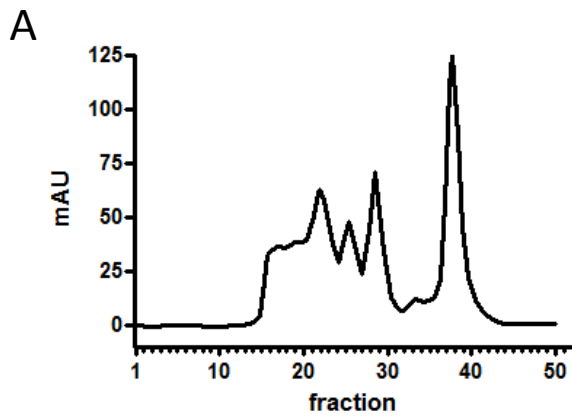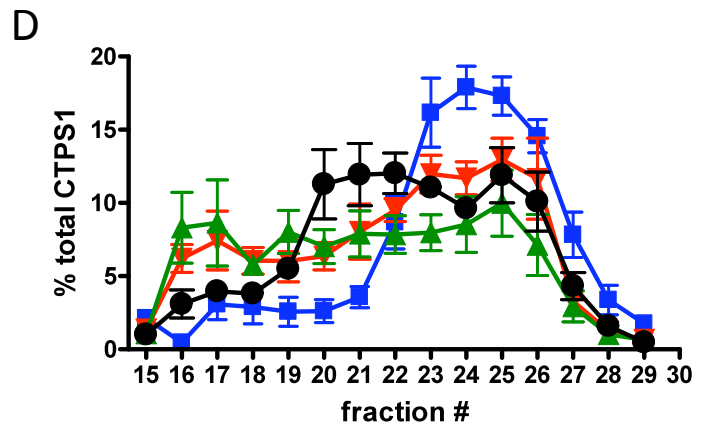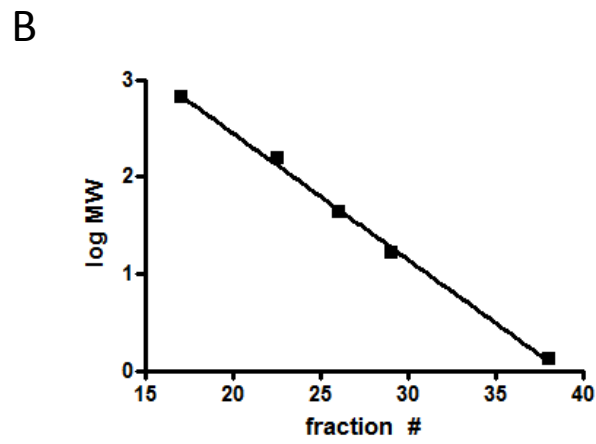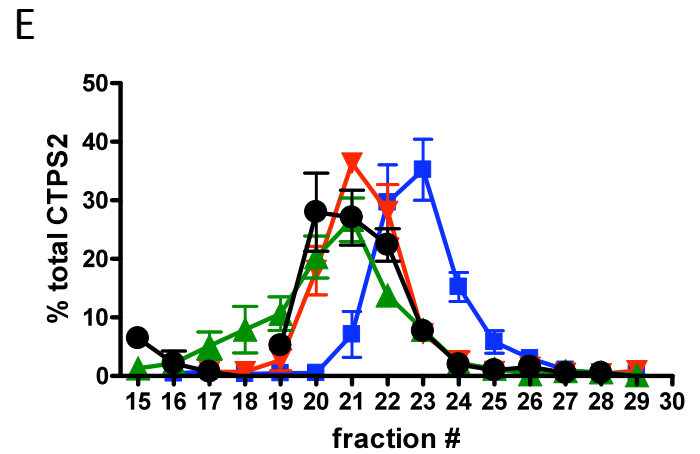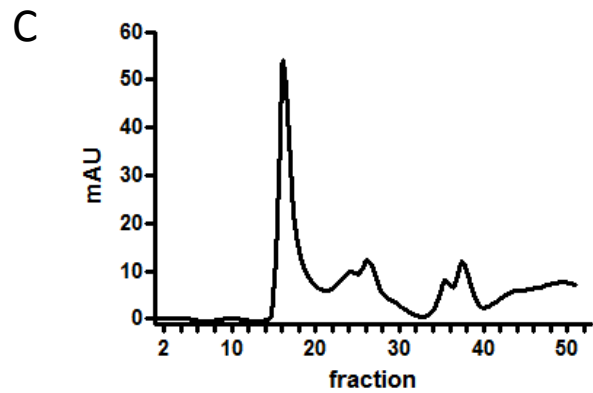

Supplemental Figure 3

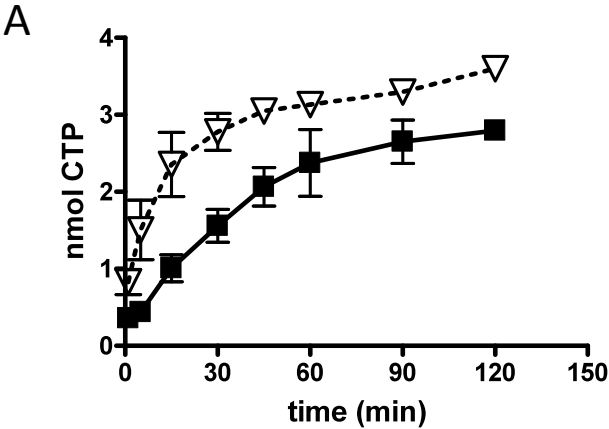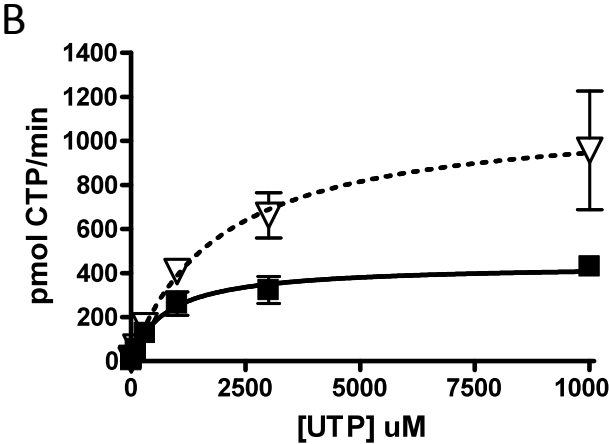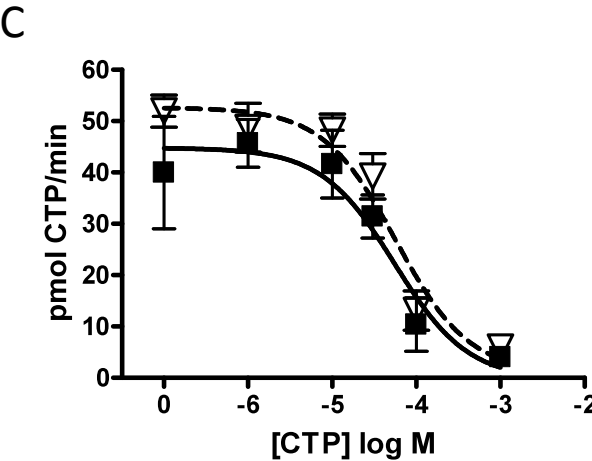

# Supplemental Figure 4A

#1798-1798 RT:32.58-32.58 NL: 1.57E3

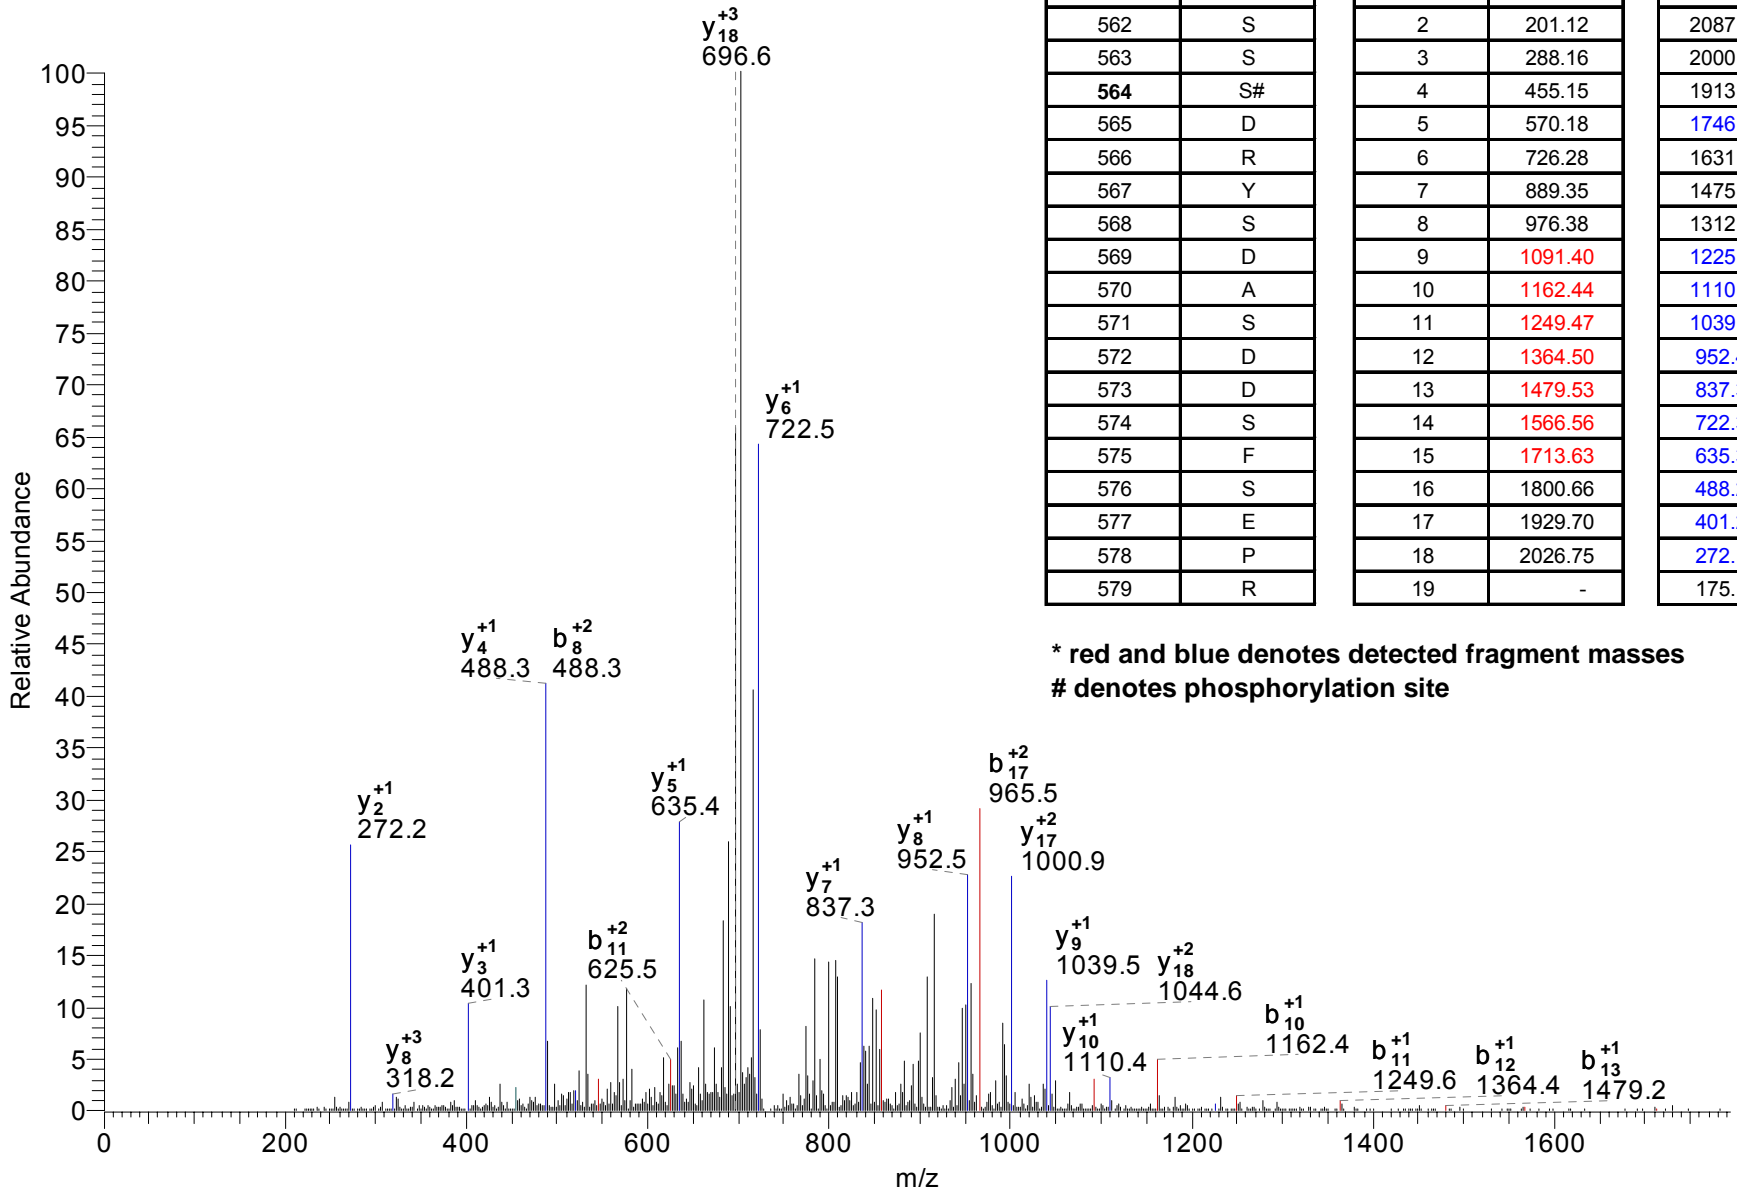

| Residue |    |
|---------|----|
| 561     | L  |
| 562     | S  |
| 563     | S  |
| 564     | S# |
| 565     | D  |
| 566     | R  |
| 567     | Y  |
| 568     | S  |
| 569     | D  |
| 570     | A  |
| 571     | S  |
| 572     | D  |
| 573     | D  |
| 574     | S  |
| 575     | F  |
| 576     | S  |
| 577     | E  |
| 578     | P  |
| 579     | R  |

| b-fragment ions |         |
|-----------------|---------|
| 1               | 114.09  |
| 2               | 201.12  |
| 3               | 288.16  |
| 4               | 455.15  |
| 5               | 570.18  |
| 6               | 726.28  |
| 7               | 889.35  |
| 8               | 976.38  |
| 9               | 1091.40 |
| 10              | 1162.44 |
| 11              | 1249.47 |
| 12              | 1364.50 |
| 13              | 1479.53 |
| 14              | 1566.56 |
| 15              | 1713.63 |
| 16              | 1800.66 |
| 17              | 1929.70 |
| 18              | 2026.75 |
| 19              | -       |

| y-fragment ions |    |
|-----------------|----|
| -               | 19 |
| 2087.78         | 18 |
| 2000.75         | 17 |
| 1913.72         | 16 |
| 1746.72         | 15 |
| 1631.69         | 14 |
| 1475.59         | 13 |
| 1312.53         | 12 |
| 1225.50         | 11 |
| 1110.47         | 10 |
| 1039.43         | 9  |
| 952.40          | 8  |
| 837.37          | 7  |
| 722.35          | 6  |
| 635.31          | 5  |
| 488.25          | 4  |
| 401.21          | 3  |
| 272.17          | 2  |
| 175.12          | 1  |

\* red and blue denotes detected fragment masses  
# denotes phosphorylation site

# Supplemental Figure 4B

#1768-1768 RT:32.07-32.07 NL: 1.01E3

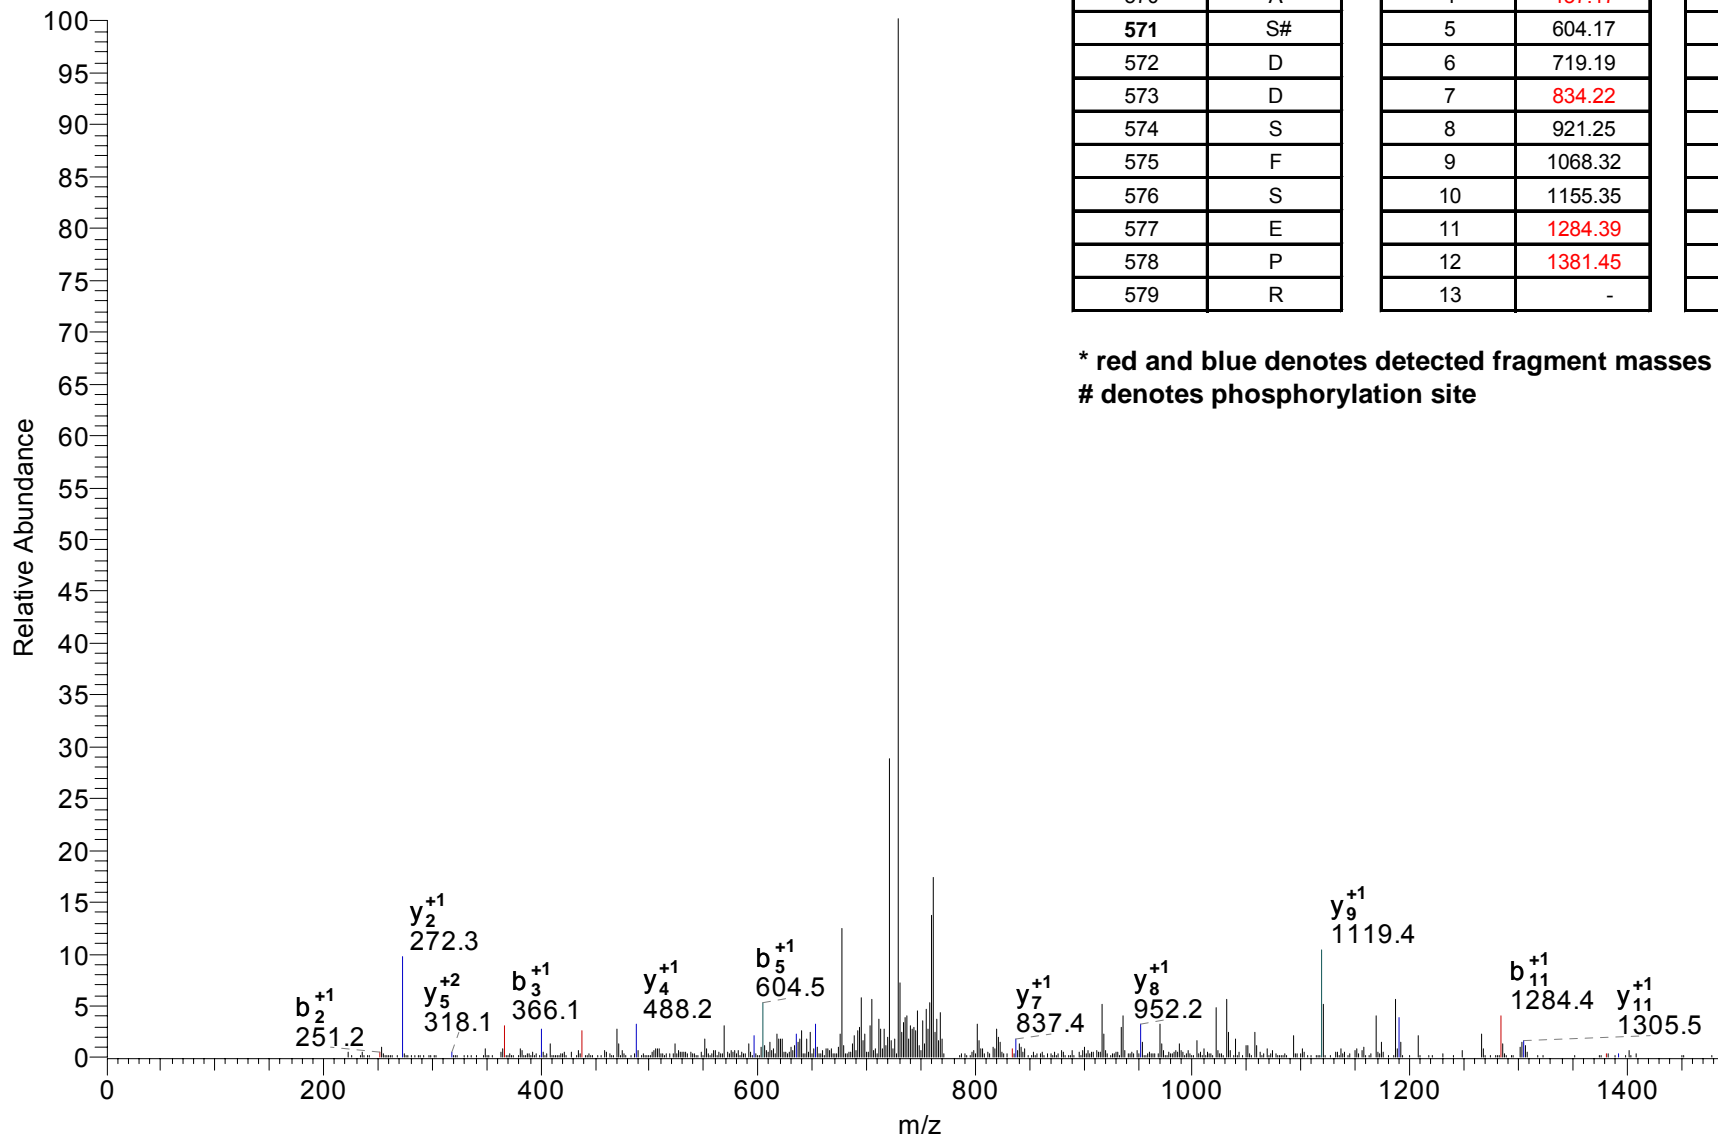

| Residue    |           |
|------------|-----------|
| 567        | Y         |
| 568        | S         |
| 569        | D         |
| 570        | A         |
| <b>571</b> | <b>S#</b> |
| 572        | D         |
| 573        | D         |
| 574        | S         |
| 575        | F         |
| 576        | S         |
| 577        | E         |
| 578        | P         |
| 579        | R         |

| b-fragment ions |                |
|-----------------|----------------|
| 1               | 164.07         |
| 2               | <b>251.10</b>  |
| 3               | <b>366.13</b>  |
| 4               | <b>437.17</b>  |
| 5               | 604.17         |
| 6               | 719.19         |
| 7               | <b>834.22</b>  |
| 8               | 921.25         |
| 9               | 1068.32        |
| 10              | 1155.35        |
| 11              | <b>1284.39</b> |
| 12              | <b>1381.45</b> |
| 13              | -              |

| y-fragment ions |    |
|-----------------|----|
| -               | 13 |
| <b>1392.50</b>  | 12 |
| <b>1305.46</b>  | 11 |
| <b>1190.44</b>  | 10 |
| 1119.40         | 9  |
| <b>952.40</b>   | 8  |
| <b>837.37</b>   | 7  |
| 722.35          | 6  |
| <b>635.31</b>   | 5  |
| <b>488.25</b>   | 4  |
| <b>401.21</b>   | 3  |
| <b>272.17</b>   | 2  |
| 175.12          | 1  |

\* red and blue denotes detected fragment masses  
 # denotes phosphorylation site

# Supplemental Figure 4C

#1734-1734 RT:31.48-31.48 NL: 9.74E2

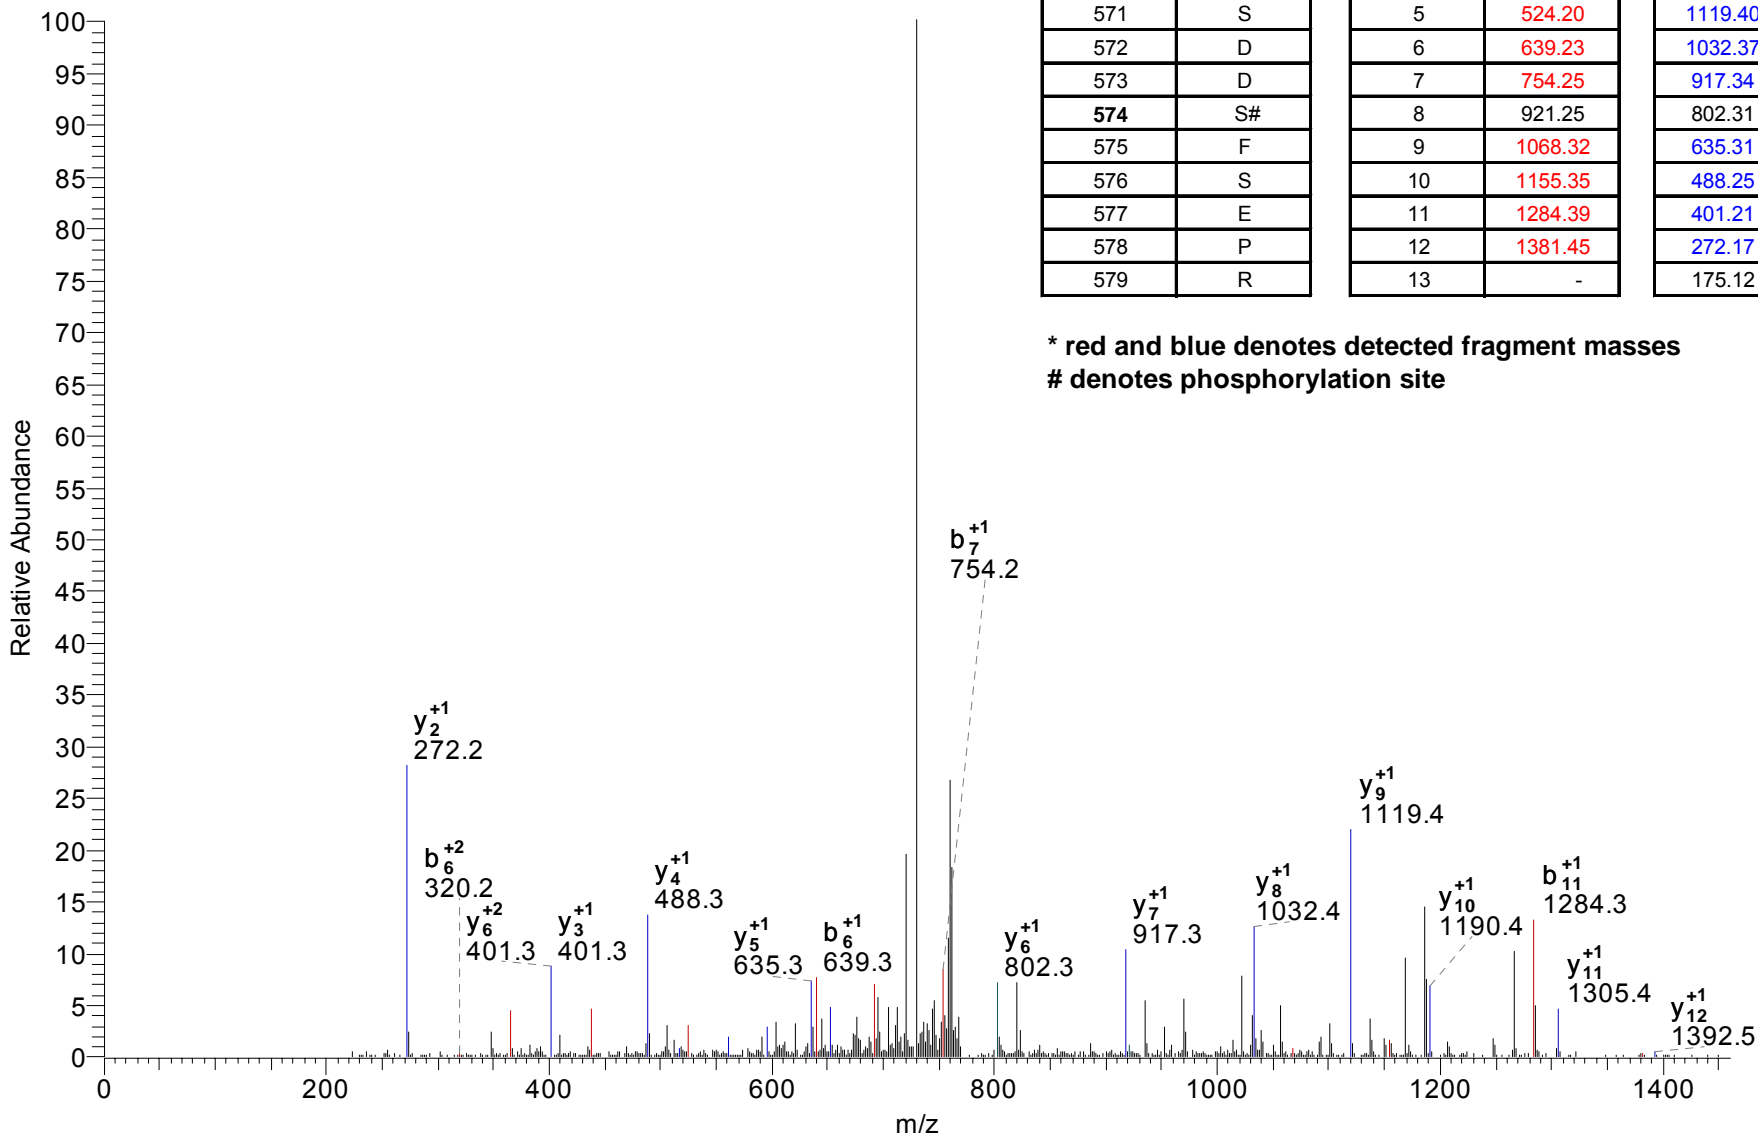

| Residue    |           |
|------------|-----------|
| 567        | Y         |
| 568        | S         |
| 569        | D         |
| 570        | A         |
| 571        | S         |
| 572        | D         |
| 573        | D         |
| <b>574</b> | <b>S#</b> |
| 575        | F         |
| 576        | S         |
| 577        | E         |
| 578        | P         |
| 579        | R         |

| b-fragment ions |                |
|-----------------|----------------|
| 1               | 164.07         |
| 2               | 251.10         |
| 3               | <b>366.13</b>  |
| 4               | <b>437.17</b>  |
| 5               | <b>524.20</b>  |
| 6               | <b>639.23</b>  |
| 7               | <b>754.25</b>  |
| 8               | 921.25         |
| 9               | <b>1068.32</b> |
| 10              | <b>1155.35</b> |
| 11              | <b>1284.39</b> |
| 12              | <b>1381.45</b> |
| 13              | -              |

| y-fragment ions |    |
|-----------------|----|
| -               | 13 |
| <b>1392.50</b>  | 12 |
| <b>1305.46</b>  | 11 |
| <b>1190.44</b>  | 10 |
| <b>1119.40</b>  | 9  |
| <b>1032.37</b>  | 8  |
| <b>917.34</b>   | 7  |
| 802.31          | 6  |
| <b>635.31</b>   | 5  |
| <b>488.25</b>   | 4  |
| <b>401.21</b>   | 3  |
| <b>272.17</b>   | 2  |
| 175.12          | 1  |

\* red and blue denotes detected fragment masses  
 # denotes phosphorylation site



# Supplemental Figure 4D

#1888-1888 RT:34.11-34.11 NL: 8.75E3

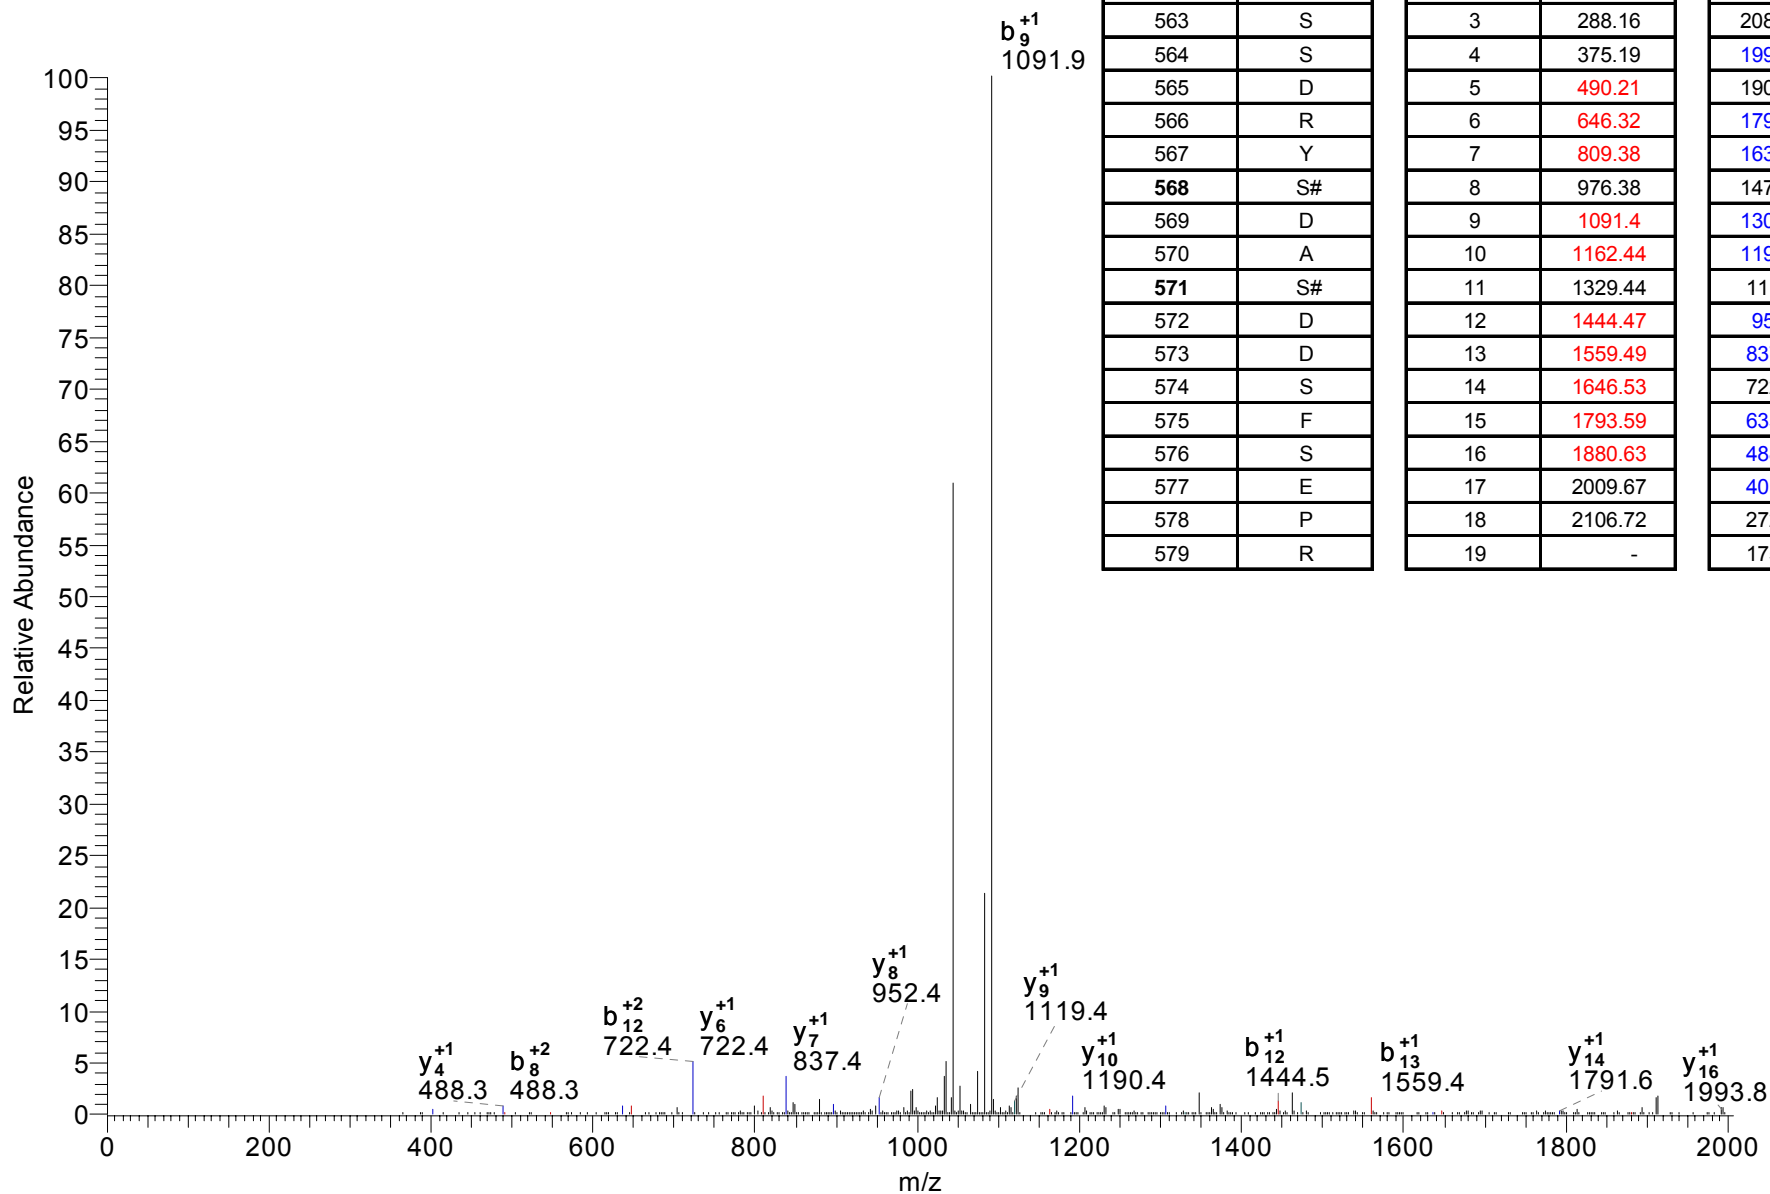

| Residue    |           |
|------------|-----------|
| 561        | L         |
| 562        | S         |
| 563        | S         |
| 564        | S         |
| 565        | D         |
| 566        | R         |
| 567        | Y         |
| <b>568</b> | <b>S#</b> |
| 569        | D         |
| 570        | A         |
| <b>571</b> | <b>S#</b> |
| 572        | D         |
| 573        | D         |
| 574        | S         |
| 575        | F         |
| 576        | S         |
| 577        | E         |
| 578        | P         |
| 579        | R         |

| b-fragment ions |         |
|-----------------|---------|
| 1               | 114.09  |
| 2               | 201.12  |
| 3               | 288.16  |
| 4               | 375.19  |
| 5               | 490.21  |
| 6               | 646.32  |
| 7               | 809.38  |
| 8               | 976.38  |
| 9               | 1091.4  |
| 10              | 1162.44 |
| 11              | 1329.44 |
| 12              | 1444.47 |
| 13              | 1559.49 |
| 14              | 1646.53 |
| 15              | 1793.59 |
| 16              | 1880.63 |
| 17              | 2009.67 |
| 18              | 2106.72 |
| 19              | -       |

| y-fragment ions |    |
|-----------------|----|
| -               | 19 |
| 2167.75         | 18 |
| 2080.72         | 17 |
| 1993.68         | 16 |
| 1906.65         | 15 |
| 1791.63         | 14 |
| 1635.52         | 13 |
| 1472.46         | 12 |
| 1305.46         | 11 |
| 1190.44         | 10 |
| 1119.4          | 9  |
| 952.4           | 8  |
| 837.37          | 7  |
| 722.35          | 6  |
| 635.31          | 5  |
| 488.25          | 4  |
| 401.21          | 3  |
| 272.17          | 2  |
| 175.12          | 1  |

# Supplemental Figure 4E

#2142-2142 RT:38.51-38.51 NL: 5.00E3

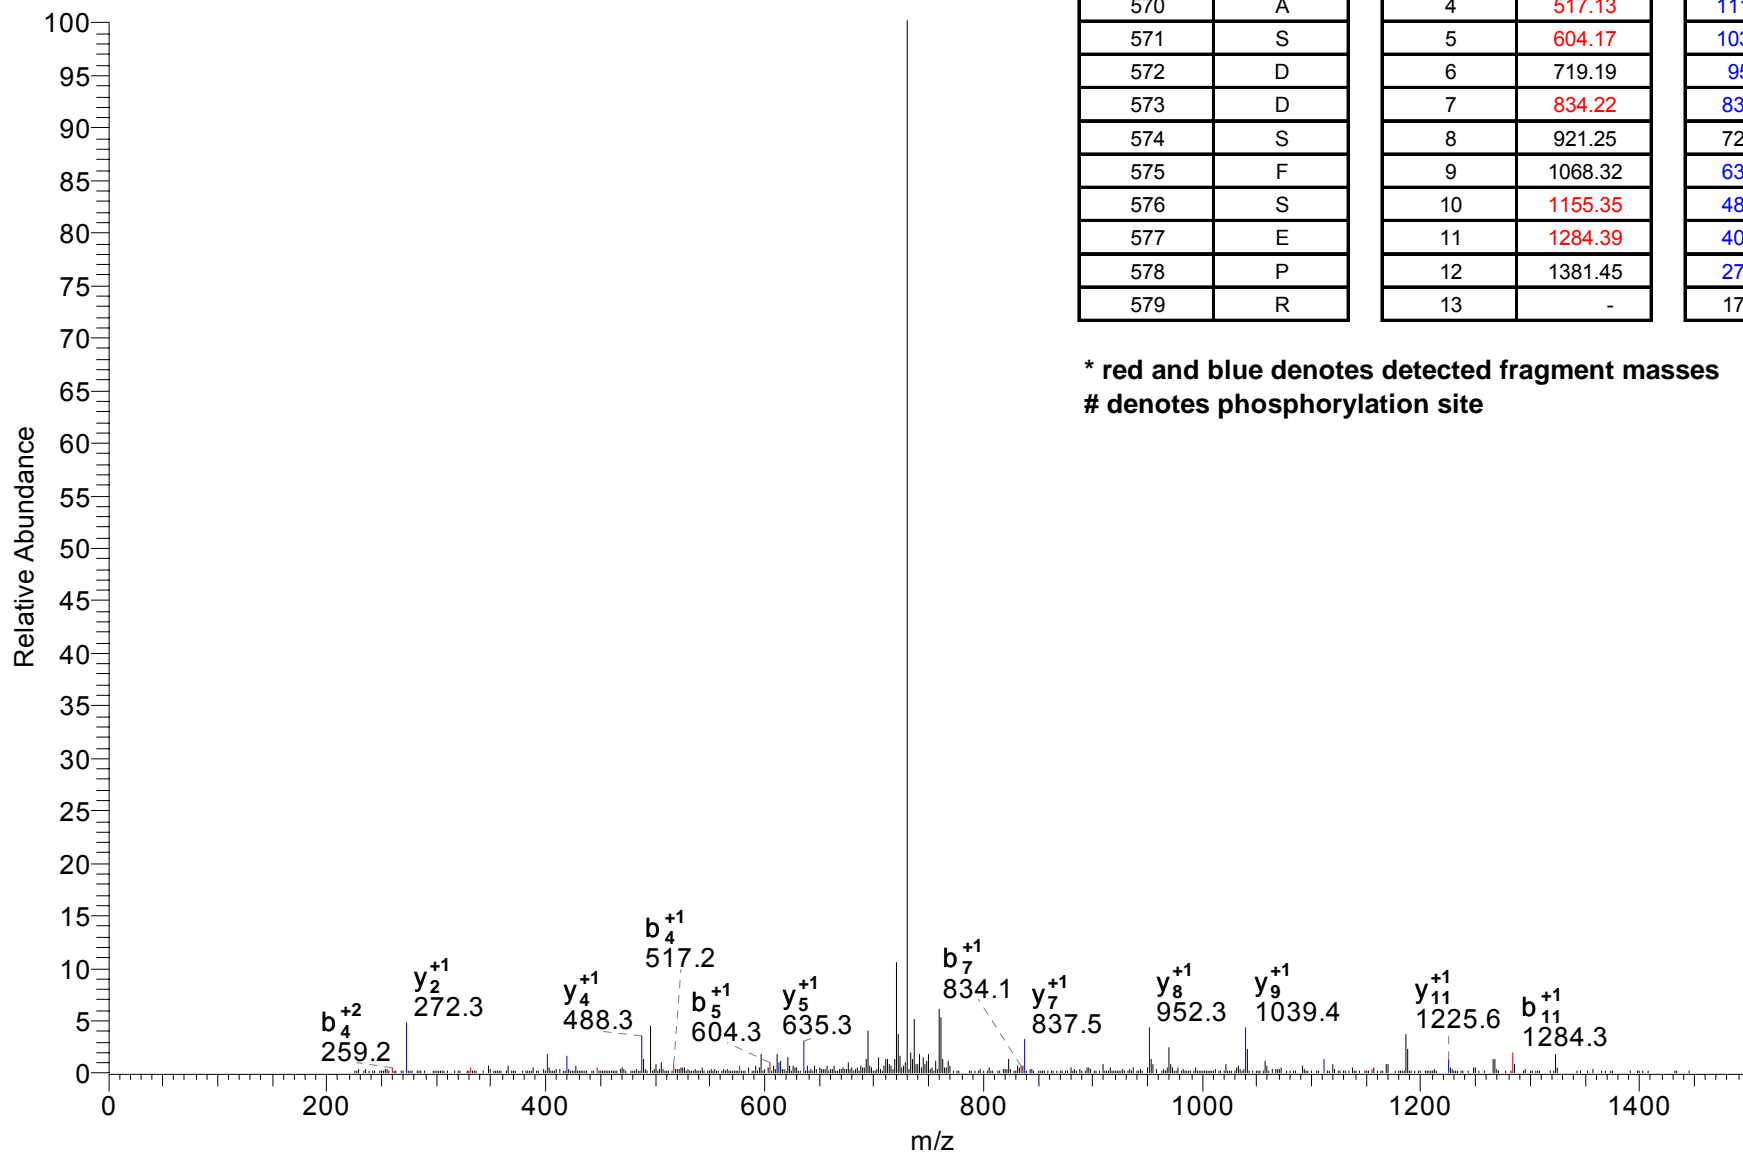

| Residue |    |
|---------|----|
| 567     | Y# |
| 568     | S  |
| 569     | D  |
| 570     | A  |
| 571     | S  |
| 572     | D  |
| 573     | D  |
| 574     | S  |
| 575     | F  |
| 576     | S  |
| 577     | E  |
| 578     | P  |
| 579     | R  |

| b-fragment ions |         |
|-----------------|---------|
| 1               | 244.04  |
| 2               | 331.07  |
| 3               | 446.1   |
| 4               | 517.13  |
| 5               | 604.17  |
| 6               | 719.19  |
| 7               | 834.22  |
| 8               | 921.25  |
| 9               | 1068.32 |
| 10              | 1155.35 |
| 11              | 1284.39 |
| 12              | 1381.45 |
| 13              | -       |

| y-fragment ions |    |
|-----------------|----|
| -               | 13 |
| 1312.53         | 12 |
| 1225.5          | 11 |
| 1110.47         | 10 |
| 1039.43         | 9  |
| 952.4           | 8  |
| 837.37          | 7  |
| 722.35          | 6  |
| 635.31          | 5  |
| 488.25          | 4  |
| 401.21          | 3  |
| 272.17          | 2  |
| 175.12          | 1  |

\* red and blue denotes detected fragment masses  
# denotes phosphorylation site

# Supplemental Figure 4F

#2129-2129 RT:38.29-38.29 NL: 1.47E3

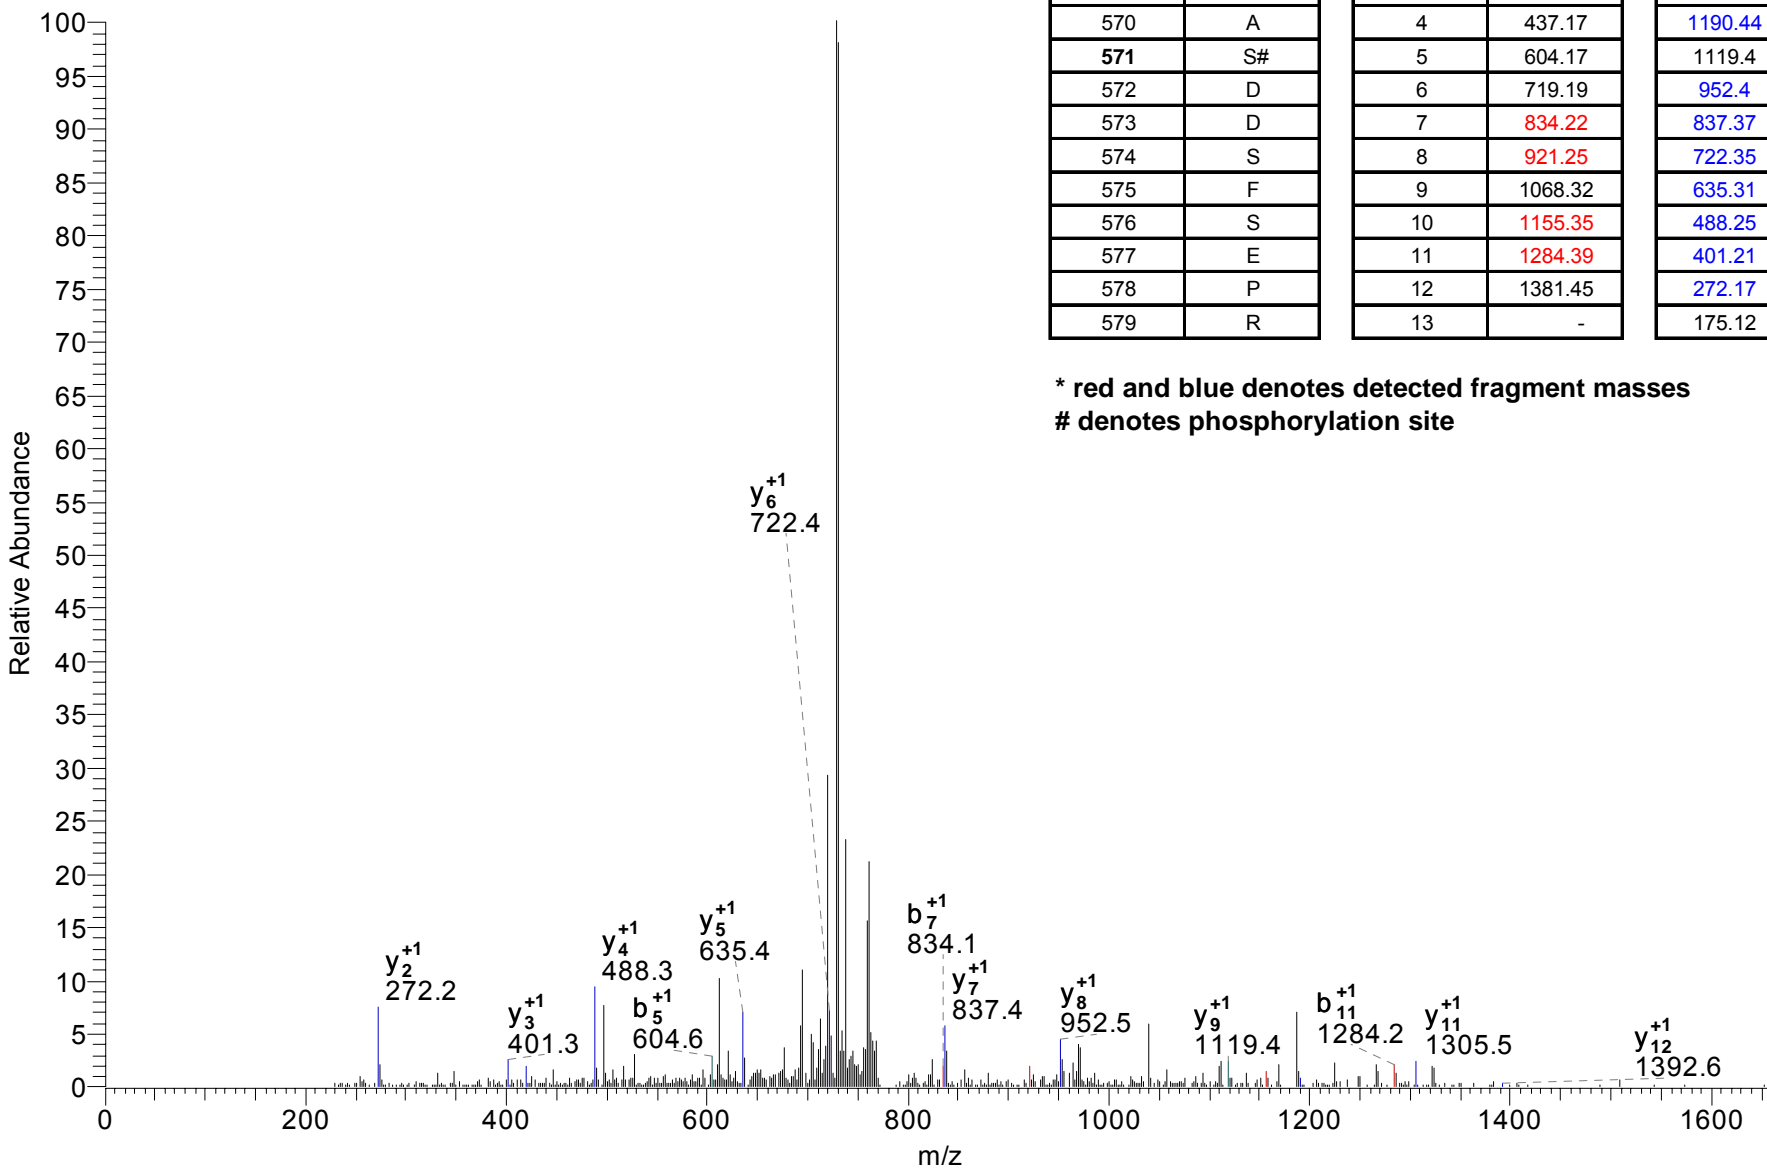

| Residue    |           |
|------------|-----------|
| 567        | Y         |
| 568        | S         |
| 569        | D         |
| 570        | A         |
| <b>571</b> | <b>S#</b> |
| 572        | D         |
| 573        | D         |
| 574        | S         |
| 575        | F         |
| 576        | S         |
| 577        | E         |
| 578        | P         |
| 579        | R         |

| b-fragment ions |                |
|-----------------|----------------|
| 1               | 164.07         |
| 2               | 251.1          |
| 3               | 366.13         |
| 4               | 437.17         |
| 5               | 604.17         |
| 6               | 719.19         |
| 7               | <b>834.22</b>  |
| 8               | <b>921.25</b>  |
| 9               | 1068.32        |
| 10              | <b>1155.35</b> |
| 11              | <b>1284.39</b> |
| 12              | 1381.45        |
| 13              | -              |

| y-fragment ions |    |
|-----------------|----|
| -               | 13 |
| <b>1392.5</b>   | 12 |
| <b>1305.46</b>  | 11 |
| <b>1190.44</b>  | 10 |
| 1119.4          | 9  |
| <b>952.4</b>    | 8  |
| <b>837.37</b>   | 7  |
| <b>722.35</b>   | 6  |
| <b>635.31</b>   | 5  |
| <b>488.25</b>   | 4  |
| <b>401.21</b>   | 3  |
| <b>272.17</b>   | 2  |
| 175.12          | 1  |

\* red and blue denotes detected fragment masses  
 # denotes phosphorylation site

# Supplemental Figure 4G

#2239-2239 RT:40.10-40.10 NL: 5.30E3

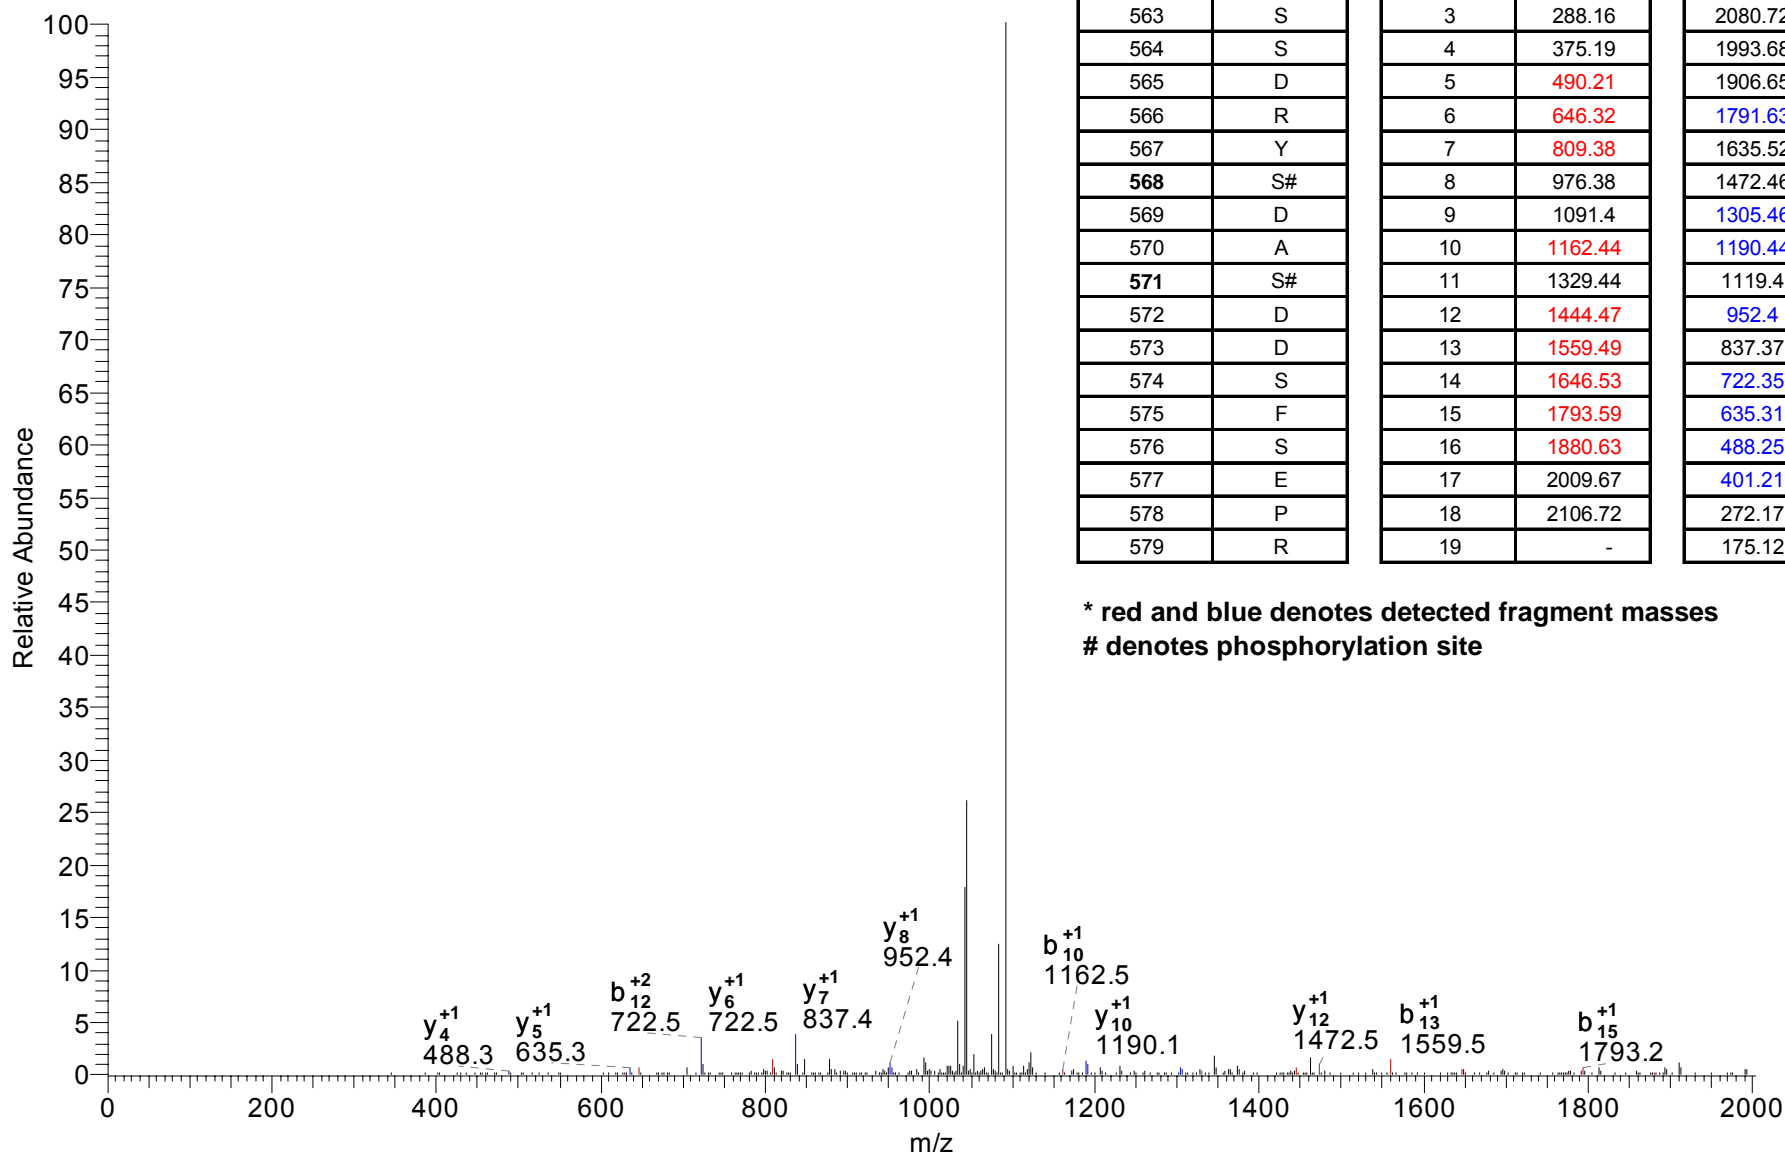

| Residue    |           |
|------------|-----------|
| 561        | L         |
| 562        | S         |
| 563        | S         |
| 564        | S         |
| 565        | D         |
| 566        | R         |
| 567        | Y         |
| <b>568</b> | <b>S#</b> |
| 569        | D         |
| 570        | A         |
| <b>571</b> | <b>S#</b> |
| 572        | D         |
| 573        | D         |
| 574        | S         |
| 575        | F         |
| 576        | S         |
| 577        | E         |
| 578        | P         |
| 579        | R         |

| b-fragment ions |                |
|-----------------|----------------|
| 1               | 114.09         |
| 2               | 201.12         |
| 3               | 288.16         |
| 4               | 375.19         |
| 5               | <b>490.21</b>  |
| 6               | <b>646.32</b>  |
| 7               | <b>809.38</b>  |
| 8               | 976.38         |
| 9               | 1091.4         |
| 10              | <b>1162.44</b> |
| 11              | 1329.44        |
| 12              | <b>1444.47</b> |
| 13              | <b>1559.49</b> |
| 14              | <b>1646.53</b> |
| 15              | <b>1793.59</b> |
| 16              | <b>1880.63</b> |
| 17              | 2009.67        |
| 18              | 2106.72        |
| 19              | -              |

| y-fragment ions |    |
|-----------------|----|
| -               | 19 |
| 2167.75         | 18 |
| 2080.72         | 17 |
| 1993.68         | 16 |
| 1906.65         | 15 |
| <b>1791.63</b>  | 14 |
| 1635.52         | 13 |
| 1472.46         | 12 |
| <b>1305.46</b>  | 11 |
| <b>1190.44</b>  | 10 |
| 1119.4          | 9  |
| <b>952.4</b>    | 8  |
| 837.37          | 7  |
| <b>722.35</b>   | 6  |
| <b>635.31</b>   | 5  |
| <b>488.25</b>   | 4  |
| <b>401.21</b>   | 3  |
| 272.17          | 2  |
| 175.12          | 1  |

\* red and blue denotes detected fragment masses

# denotes phosphorylation site

## Supplemental Figure 5

### A LS Sequence Coverage (39.25% by amino acids)

MKYILVTGGVISGIGKGI IASSIGTILKSCGLRVTAIKIDPYINIDAGTFSPYEHGEVFLNDGGEVDL DLGNYERFLD  
INLYKDN NIT TGKIYQH VINKERRGDYLGKTVQVVP HITDAVQEWVMNQAKVPVDGNKEEPQICVIELGGTIGDIEGMP  
FVEAFRQFQFKAKRENFCNIHVSLVPQLSATGEQKTKPTQNSVRALRGLGLSPDLIVCRSSTPIEMAVKEKISMFCHVN  
PEQVICIHDVSS TYRVPVLL EEQSIVKYFKERLHLP IGD SASNLLFKWRNMADRYERLQKICSI ALVGKYTKLRDCYAS  
VFKALEHSALAINHKLNLMYIDSIDLEKITETEDPVKFHEAWQKLCADGILVPGGFGIRGTLGKLQAISWARTK KIPF  
LGVCLGMQLAVIEFARNCLNLK DADSTEF RPNAPVPLVIDMPEHNPNGLGGTMR LGIRRTVFKTENSILRKLYGDVPFI  
EERHRH RFEVNP NLIKQFEQNDLSFVGQDVDGDRMEI IELANHPYFVG VQFHPEFSSRPMKPSPPYLGLLLAATGNLNA  
YLQQGCKLSSSDRYSDASDDSFSEPRIAELEIS \_

### B HS Sequence Coverage (37.54% by amino acids)

MKYILVTGGVISGIGKGI IASSIGTILKSCGLRVTAIKIDPYINIDAGTFSPYEHGEVFLNDGGEVDL DLGNYERFLD  
INLYKDN NIT TGKIYQH VINKERRGDYLGKTVQVVP HITDAVQEWVMNQAKVPVDGNKEEPQICVIELGGTIGDIEGMP  
FVEAFRQFQFKAKRENFCNIHVSLVPQLSATGEQKTKPTQNSVRALRGLGLSPDLIVCRSSTPIEMAVKEKISMFCHVN  
PEQVICIHDVSS TYRVPVLL EEQSIVKYFKERLHLP IGD SASNLLFKWRNMADRYERLQKICSI ALVGKYTKLRDCYAS  
VFKALEHSALAINHKLNLMYIDSIDLEKITETEDPVKFHEAWQKLCADGILVPGGFGIRGTLGKLQAISWARTK KIPF  
LGVCLGMQLAVIEFARNCLNLK DADSTEF RPNAPVPLVIDMPEHNPNGLGGTMR LGIRRTVFKTENSILRKLYGDVPFI  
EERHRH RFEVNP NLIKQFEQNDLSFVGQDVDGDRMEI IELANHPYFVG VQFHPEFSSRPMKPSPPYLGLLLAATGNLNA  
YLQQGCKLSSSDRYSDASDDSFSEPRIAELEIS \_
